# Supplementary material for: Association Between Hospital Adoption of an Emergency Department Treatment Pathway for Opioid Use Disorder and Patient Initiation of Buprenorphine After Discharge
Source: PubMed Central journal article supplement (PMC10313142; doi:10.1001/jamahealthforum.2023.0245), 2023-03-24
Supplement: jamahealthforum-e230245-s001.pdf [file jamahealthforum-e230245-s001.pdf]

## Supplemental Online Content

Solomon KT, O'Connor J, Gibbons JB, et al. Association between hospital adoption of an emergency department treatment pathway for opioid use disorder and patient initiation of buprenorphine after discharge. *JAMA Health Forum*. 2023;4(3):e230245. doi:10.1001/jamahealthforum.2023.0245

**eTable 1.** Codes Used to Identify Opioid Use Disorder (OUD) Emergency Department (ED) Encounters and Medication for OUD

**eTable 2.** List of Hospital-Level and Hospital-Level Patient Composition Characteristics That May Be Associated With Patients' Probability of Continuing Buprenorphine Treatment

**eTable 3.** Characteristics of the Study Population, With Matched Hospital Sample

**eTable 4.** Covariate Estimates From Unadjusted Analyses using the Main Model Specification

**eTable 5.** Association of the Opioid Hospital Quality Improvement Program (O-HQIP) Attesting to Patient Treatment With Buprenorphine Within 30 Days of Index Emergency Department (ED) Visit, With April 2018 as the Implementation Date and Preintervention Data

**eFigure.** Exploratory Plot Showing the Unadjusted Monthly Prevalence of 30-Day Buprenorphine Treatment for Patients Who Visited Opioid Hospital Quality Improvement Program (HQIP)– and non–Opioid (HQIP)–Attesting Hospitals, 2017-2020

This supplemental material has been provided by the authors to give readers additional information about their work.

**eTable 1.** Codes Used to Identify Opioid Use Disorder (OUD) Emergency Department (ED) Encounters and Medication for OUD

|                                                                                                          |                                                                                                                                                                                                                                                                                                                                                                                                                                                                                                                                                                                                                                                                                                                                                                                                                                                                                                                                                                                                                                                                                                                                                                                                                                                                                                                                                                                                                                                                                                                                                                                                                                                                                                                                                                                                                                                                                                                                                                                                                                                                                                                                                                                                                                                                                                                                                                                                                                                                                                                                                                                                                                       |
|----------------------------------------------------------------------------------------------------------|---------------------------------------------------------------------------------------------------------------------------------------------------------------------------------------------------------------------------------------------------------------------------------------------------------------------------------------------------------------------------------------------------------------------------------------------------------------------------------------------------------------------------------------------------------------------------------------------------------------------------------------------------------------------------------------------------------------------------------------------------------------------------------------------------------------------------------------------------------------------------------------------------------------------------------------------------------------------------------------------------------------------------------------------------------------------------------------------------------------------------------------------------------------------------------------------------------------------------------------------------------------------------------------------------------------------------------------------------------------------------------------------------------------------------------------------------------------------------------------------------------------------------------------------------------------------------------------------------------------------------------------------------------------------------------------------------------------------------------------------------------------------------------------------------------------------------------------------------------------------------------------------------------------------------------------------------------------------------------------------------------------------------------------------------------------------------------------------------------------------------------------------------------------------------------------------------------------------------------------------------------------------------------------------------------------------------------------------------------------------------------------------------------------------------------------------------------------------------------------------------------------------------------------------------------------------------------------------------------------------------------------|
| NDC codes for buprenorphine                                                                              | 00054017613, 00054017713, 00054018813, 00054018913, 00093537856, 00093537956, 00093572056, 00093572156, 00228315303, 00228315373, 00228315403, 00228315473, 00228315503, 00228315567, 00228315573, 00228315603, 00228315673, 00378092393, 00378092493, 00378876716, 00378876793, 00378876816, 00378876893, 00406192303, 00406192309, 00406192403, 00406192409, 00406800503, 00406802003, 00490005100, 00490005130, 00490005160, 00490005190, 00517072505, 00781721606, 00781721664, 00781722706, 00781722764, 00781723806, 00781723864, 00781724906, 00781724964, 12496010001, 12496010005, 12496030001, 12496030005, 12496120201, 12496120203, 12496120401, 12496120403, 12496120801, 12496120803, 12496121201, 12496121203, 12496127802, 12496128302, 12496130602, 12496131002, 16590066605, 16590066630, 16590066705, 16590066730, 16590066790, 23490927003, 23490927006, 23490927009, 35356000407, 35356000430, 35356055530, 35356055630, 42023017910, 42291017430, 42291017530, 42858050103, 42858050203, 43063018407, 43063018430, 43063066706, 43063075306, 43598057901, 43598057930, 43598058001, 43598058030, 43598058101, 43598058130, 43598058201, 43598058230, 47781035503, 47781035603, 47781035703, 47781035803, 49349055402, 49999039507, 49999039515, 49999039530, 49999063830, 49999063930, 50090157100, 50090292400, 50268014411, 50268014415, 50268014511, 50268014515, 50383028793, 50383029493, 50383092493, 50383093093, 52125067802, 52427069203, 52427069211, 52427069403, 52427069411, 52427069803, 52427069811, 52427071203, 52427071211, 52440010014, 52959030430, 52959074930, 53217013830, 53217024630, 54123011430, 54123090730, 54123091430, 54123092930, 54123095730, 54123098630, 54569549600, 54569573900, 54569573901, 54569573902, 54569639900, 54569640800, 54569657800, 54868570700, 54868570701, 54868570702, 54868570703, 54868570704, 54868575000, 55045378403, 55154496204, 55700014730, 55700018430, 55700030230, 55700030330, 55887031204, 55887031215, 58284010014, 59385001201, 59385001230, 59385001401, 59385001430, 59385001601, 59385001630, 60429058630, 60429058633, 60429058730, 60429058733, 61786067802, 61786091102, 61786091202, 62175045232, 62175045832, 62756045983, 62756046083, 62756096983, 62756097083, 63629402801, 63629402802, 63629403401, 63629403402, 63629403403, 63629403404, 63629409201, 63629409202, 63629507401, 63874108403, 63874108503, 63874117303, 63874117403, 64725093004, 64725192404, 65162041503, 65162041509, 65162041603, 65162041609, 66336001530, 66336001630, 68071138003, 68071151003, 68258299103, 68258299903, 68308020230, 68308020830 |
| ED procedure codes for diagnoses of opioid dependence, withdrawal, abuse, and overdose                   | 99281, 99282, 99283, 99284, 99285, G0380, G0381, G0382, G0383, G0384, G8354, G0385                                                                                                                                                                                                                                                                                                                                                                                                                                                                                                                                                                                                                                                                                                                                                                                                                                                                                                                                                                                                                                                                                                                                                                                                                                                                                                                                                                                                                                                                                                                                                                                                                                                                                                                                                                                                                                                                                                                                                                                                                                                                                                                                                                                                                                                                                                                                                                                                                                                                                                                                                    |
| ED revenue codes for diagnoses of opioid dependence, withdrawal, abuse, and overdose                     | 0450, 0451, 0452, 0456, 0459, 0981                                                                                                                                                                                                                                                                                                                                                                                                                                                                                                                                                                                                                                                                                                                                                                                                                                                                                                                                                                                                                                                                                                                                                                                                                                                                                                                                                                                                                                                                                                                                                                                                                                                                                                                                                                                                                                                                                                                                                                                                                                                                                                                                                                                                                                                                                                                                                                                                                                                                                                                                                                                                    |
| All professional and outpatient claims with a procedure code for buprenorphine or buprenorphine/naloxone | J0571, J0572, J0573, J0574, J0575                                                                                                                                                                                                                                                                                                                                                                                                                                                                                                                                                                                                                                                                                                                                                                                                                                                                                                                                                                                                                                                                                                                                                                                                                                                                                                                                                                                                                                                                                                                                                                                                                                                                                                                                                                                                                                                                                                                                                                                                                                                                                                                                                                                                                                                                                                                                                                                                                                                                                                                                                                                                     |
| ICD-10 “F11” codes for OUD diagnoses                                                                     | F1110, F1111, F11120, F11121, F11122, F11129, F1114, F11150, F11151, F11159, F11181, F11182, F11188, F1119, F1120, F1121, F11220, F11221, F11222, F11229, F1123, F1124, F11250, F11251, F11259, F11281, F11282, F11288, F1129, F1190, F11920, F11921, F11922, F11929, F1193, F1194, F11950, F11951, F11959, F11981, F11982, F11988, F1199                                                                                                                                                                                                                                                                                                                                                                                                                                                                                                                                                                                                                                                                                                                                                                                                                                                                                                                                                                                                                                                                                                                                                                                                                                                                                                                                                                                                                                                                                                                                                                                                                                                                                                                                                                                                                                                                                                                                                                                                                                                                                                                                                                                                                                                                                             |
| ICD-10 “T40” codes for opioid overdose diagnoses                                                         | T400X1A, T400X1D, T400X1S, T400X2A, T400X2D, T400X2S, T400X3A, T400X3D, T400X3S, T400X4A, T400X4D, T400X4S, T400X5A, T400X5D, T400X5S, T401X1A, T401X1D, T401X1S, T401X2A, T401X2D, T401X2S, T401X3A, T401X3D, T401X3S, T401X4A, T401X4D, T401X4S, T402X1A, T402X1D, T402X1S, T402X2A, T402X2D,                                                                                                                                                                                                                                                                                                                                                                                                                                                                                                                                                                                                                                                                                                                                                                                                                                                                                                                                                                                                                                                                                                                                                                                                                                                                                                                                                                                                                                                                                                                                                                                                                                                                                                                                                                                                                                                                                                                                                                                                                                                                                                                                                                                                                                                                                                                                       |

|  |                                                                                                                                                                                                                                                                                                                                                                                                                                                                                                                                                                                                                                                      |
|--|------------------------------------------------------------------------------------------------------------------------------------------------------------------------------------------------------------------------------------------------------------------------------------------------------------------------------------------------------------------------------------------------------------------------------------------------------------------------------------------------------------------------------------------------------------------------------------------------------------------------------------------------------|
|  | T402X2S, T402X3A, T402X3D, T402X3S, T402X4A, T402X4D, T402X4S, T402X5A, T402X5D, T402X5S, T403X1A, T403X1D, T403X1S, T403X2A, T403X2D, T403X2S, T403X3A, T403X3D, T403X3S, T403X4A, T403X4D, T403X4S, T403X5A, T403X5D, T403X5S, T404X1A, T404X1D, T404X1S, T404X2A, T404X2D, T404X2S, T404X3A, T404X3D, T404X3S, T404X4A, T404X4D, T404X4S, T404X5A, T404X5D, T404X5S, T40601A, T40601D, T40601S, T40602A, T40602D, T40602S, T40603A, T40603D, T40603S, T40604A, T40604D, T40604S, T40605A, T40605D, T40605S, T40691A, T40691D, T40691S, T40692A, T40692D, T40692S, T40693A, T40693D, T40693S, T40694A, T40694D, T40694S, T40695A, T40695D, T40695S |
|--|------------------------------------------------------------------------------------------------------------------------------------------------------------------------------------------------------------------------------------------------------------------------------------------------------------------------------------------------------------------------------------------------------------------------------------------------------------------------------------------------------------------------------------------------------------------------------------------------------------------------------------------------------|

**eTable 2.** List of Hospital-Level and Hospital-Level Patient Composition Characteristics That May Be Associated With Patients' Probability of Continuing Buprenorphine Treatment

|                                                                                                                                                   |                                                                                                                                                                                                                                                                                                                                                                                                                                                         |
|---------------------------------------------------------------------------------------------------------------------------------------------------|---------------------------------------------------------------------------------------------------------------------------------------------------------------------------------------------------------------------------------------------------------------------------------------------------------------------------------------------------------------------------------------------------------------------------------------------------------|
| Hospital-level and hospital-level patient-composition characteristics that may affect patients' probability of continuing buprenorphine treatment | non-profit status, teaching hospital designation, system membership, critical access designation, number of licensed beds, number of total inpatient admissions, percentage of admissions where Medicaid was the primary payor, number of psychiatric beds, mean patient age, patient race and ethnicity proportions, the proportion of patients living in a rural residence, and the total count of patient Elixhauser comorbidities of study patients |
|---------------------------------------------------------------------------------------------------------------------------------------------------|---------------------------------------------------------------------------------------------------------------------------------------------------------------------------------------------------------------------------------------------------------------------------------------------------------------------------------------------------------------------------------------------------------------------------------------------------------|

*Notes.* The 2018 American Hospital Association data was used to identify hospital. Patient characteristics were obtained using the Medicaid inpatient, outpatient, and enrollment files from 2018.

**eTable 3.** Characteristics of the Study Population, With Matched Hospital Sample

| <i>Time period</i>                                       | <b>O-HQIP attesting</b>        |                                | <b>Non-O-HQIP attesting</b>    |                                |
|----------------------------------------------------------|--------------------------------|--------------------------------|--------------------------------|--------------------------------|
|                                                          | <b>2017-2018</b>               | <b>2019-2020</b>               | <b>2017-2018</b>               | <b>2019-2020</b>               |
|                                                          | <b>n or mean (%<br/>or SD)</b> | <b>n or mean (%<br/>or SD)</b> | <b>n or mean (%<br/>or SD)</b> | <b>n or mean (%<br/>or SD)</b> |
| <b><i>Treatment with Buprenorphine (n, %)</i></b>        |                                |                                |                                |                                |
| Buprenorphine within 30 Days of Index Visit              | 64 (4.1)                       | 79 (7.5)                       | 84 (5.1)                       | 47 (5.9)                       |
| <b><i>Patient Characteristics</i></b>                    |                                |                                |                                |                                |
| Age at index visit (mean, SD)                            | 36.71 (10.68)                  | 37.96 (11.00)                  | 35.61 (10.33)                  | 37.69 (10.95)                  |
| Male (n, %)                                              | 803 (51.8)                     | 585 (55.6)                     | 867 (52.6)                     | 435 (54.3)                     |
| <b><i>Race/ethnicity</i></b>                             |                                |                                |                                |                                |
| Hispanic                                                 | 80 (5.2)                       | 71 (6.7)                       | 92 (5.6)                       | 54 (6.7)                       |
| Non-Hispanic Black                                       | 246 (15.9)                     | 215 (20.4)                     | 114 (6.9)                      | 84 (10.5)                      |
| Non-Hispanic White                                       | 1184 (76.4)                    | 733 (69.7)                     | 1405 (85.2)                    | 637 (79.5)                     |
| Other race/ethnic groups <sup>a</sup>                    | 40 (2.6)                       | 33 (3.1)                       | 38 (2.3)                       | 26 (3.2)                       |
| <b><i>Eligibility Category (n, %)</i></b>                |                                |                                |                                |                                |
| Children                                                 | 44 (2.8)                       | 18 (1.7)                       | 55 (3.3)                       | 22 (2.7)                       |
| Disabled or Chron. Ill                                   | 265 (17.1)                     | 189 (18.0)                     | 239 (14.5)                     | 147 (18.4)                     |
| Non-Disabled Adults                                      | 249 (16.1)                     | 174 (16.5)                     | 228 (13.8)                     | 129 (16.1)                     |
| Expansion Adults                                         | 961 (62.0)                     | 661 (62.8)                     | 1083 (65.7)                    | 495 (61.8)                     |
| <b><i>Managed Care Organization Region (n, %)</i></b>    |                                |                                |                                |                                |
| Lehigh Capital                                           | 337 (21.7)                     | 223 (21.2)                     | 260 (15.8)                     | 122 (15.2)                     |
| New East                                                 | 378 (24.4)                     | 214 (20.3)                     | 928 (56.3)                     | 428 (53.4)                     |
| New West                                                 | 67 (4.3)                       | 37 (3.5)                       | 113 (6.9)                      | 72 (9.0)                       |
| Southeast                                                | 541 (34.9)                     | 449 (42.7)                     | 225 (13.6)                     | 125 (15.6)                     |
| Southwest                                                | 227 (14.6)                     | 129 (12.3)                     | 123 (7.5)                      | 54 (6.7)                       |
| <b>Address in rural area (n, %)</b>                      | 198 (12.8)                     | 129 (12.3)                     | 306 (18.6)                     | 207 (25.8)                     |
| <b><i>Comorbidities (n, %)</i></b>                       |                                |                                |                                |                                |
| Hepatitis C virus                                        | 637 (41.1)                     | 445 (42.3)                     | 677 (41.1)                     | 345 (43.1)                     |
| Anxiety disorder                                         | 704 (45.4)                     | 437 (41.5)                     | 743 (45.1)                     | 355 (44.3)                     |
| Mood disorder                                            | 107 (6.9)                      | 99 (9.4)                       | 157 (9.5)                      | 69 (8.6)                       |
| Schizophrenia or other psychotic disorder                | 125 (8.1)                      | 110 (10.5)                     | 99 (6.0)                       | 82 (10.2)                      |
| Posttraumatic stress disorder                            | 658 (7.2)                      | 510 (9.3)                      | 119 (6.3)                      | 99 (10.5)                      |
| Skin and soft tissue infections                          | 1305 (14.3)                    | 620 (11.3)                     | 257 (13.5)                     | 119 (12.6)                     |
| <b><i>Hospital characteristics (n, SD)</i></b>           |                                |                                |                                |                                |
| Number of outpatient visits                              | 3.61 (5.74)                    | 3.42 (4.66)                    | 3.43 (4.42)                    | 3.49 (4.42)                    |
| Number of inpatient admissions                           | 0.43 (1.24)                    | 0.41 (1.24)                    | 0.34 (0.81)                    | 0.34 (0.98)                    |
| Number of opioid prescriptions fills                     | 0.98 (2.57)                    | 0.42 (1.63)                    | 0.88 (2.64)                    | 0.47 (1.71)                    |
| Number of benzodiazepine prescription                    | 0.83 (2.12)                    | 0.52 (1.75)                    | 0.85 (2.12)                    | 0.65 (1.96)                    |
| Elixhauser comorbidity index score at the index ED visit | 2.11 (2.51)                    | 2.12 (2.59)                    | 1.94 (2.36)                    | 1.99 (2.53)                    |
| Number of unique providers prescribing opioids           | 206 (13.3)                     | 92 (8.7)                       | 231 (14.0)                     | 96 (12.0)                      |
| <b><i>N</i></b>                                          | <b>1550</b>                    | <b>1052</b>                    | <b>1649</b>                    | <b>801</b>                     |

*Notes.* The number of outpatient visits, inpatient admissions, opioid prescriptions, benzodiazepine prescription fills, and unique providers prescribing opioids are measured six months prior to the patient's index ED visit. For confidentiality purposes and adherence to Centers for Medicare & Medicaid Services' regulations, we do not report statistics when a small number of individuals, i.e., less than 11 individuals, had the relevant characteristic.

<sup>a</sup> Other race/ethnic group includes American Indian, Alaska Native, Asian, Native Hawaiian, and Pacific Islander

**eTable 4.** Covariate Estimates From Unadjusted Analyses using the Main Model Specification

| Variable:                                                                              | Coefficient | Confidence interval |        |
|----------------------------------------------------------------------------------------|-------------|---------------------|--------|
| Buprenorphine within 30 days                                                           | 0.025**     | 0.005               | 0.047  |
| Age at index visit                                                                     | 0.000       | -0.001              | 0.000  |
| Male                                                                                   | 0.013       | 0.006               | 0.020  |
| Race/Ethnicity                                                                         |             |                     |        |
| Hispanic                                                                               | -0.002      | -0.012              | 0.008  |
| Non-Hispanic Black                                                                     | -0.017      | -0.028              | -0.007 |
| Other race/ethnicity <sup>a</sup>                                                      | 0.000       | -0.019              | 0.019  |
| Eligibility Categories                                                                 |             |                     |        |
| Pregnant Women                                                                         |             |                     |        |
| Children                                                                               | -0.060      | -0.096              | -0.023 |
| Disabled or Chron. Ill                                                                 | -0.055      | -0.085              | -0.025 |
| Non-Disabled Adults                                                                    | -0.034      | -0.064              | -0.004 |
| Expansion                                                                              | -0.042      | -0.071              | -0.012 |
| Rural                                                                                  | -0.005      | -0.022              | 0.012  |
| MCO Regions                                                                            |             |                     |        |
| Lehigh/Capital                                                                         |             |                     |        |
| New East                                                                               | 0.012       | -0.008              | 0.031  |
| New West                                                                               | 0.000       | -0.040              | 0.039  |
| Southeast                                                                              | -0.011      | -0.033              | 0.012  |
| Southwest                                                                              | 0.021       | -0.011              | 0.052  |
| Number of out-patient visits in 6 months prior to index admission                      | -0.001      | -0.001              | 0.000  |
| Number of in-patient admissions in 6 months prior to index admission                   | -0.002      | -0.004              | 0.001  |
| Number of benzodiazepine prescription fills in 6 months prior to index admission       | -0.001      | -0.002              | 0.001  |
| Number of study patient opioid prescription fills in 6 months prior to index admission | -0.001      | -0.003              | 0.001  |
| Number of unique opioid prescribers in 6 months prior to index admission               | 0.002       | -0.004              | 0.007  |
| Comorbidities related to OUD                                                           |             |                     |        |
| Hepatitis C                                                                            | 0.010       | -0.002              | 0.022  |
| Hepatitis B                                                                            | 0.000       | -0.049              | 0.048  |
| HIV                                                                                    | -0.021      | -0.039              | -0.002 |
| Anxiety Disorder                                                                       | 0.014       | 0.004               | 0.024  |
| Mood disorder                                                                          | -0.001      | -0.008              | 0.006  |
| Schizophrenia and other psychotic disorders                                            | -0.012      | -0.022              | -0.001 |
| PTSD                                                                                   | 0.007       | -0.008              | 0.022  |
| Intracranial and Intraspinous Abscess                                                  | 0.002       | -0.071              | 0.076  |
| Osteomyelitis                                                                          | -0.008      | -0.043              | 0.027  |
| Endocarditis                                                                           | 0.010       | -0.047              | 0.067  |
| Soft Skin Tissue Infection                                                             | 0.013       | 0.000               | 0.027  |

*Notes.* All analyses used linear regression at the patient level and included an indicator variable for if the patient was treated at an O-HQIP attesting hospital after January 1, 2019. All models also included hospital-level fixed effects to control for time-invariant hospital unobserved effects. The sample sizes of the overall and year-specific models are equal, i.e., 17428. Clustering was performed at the hospital level. \*\* = statistically different from zero at the 5% level. Adjusted regression models also controlled patient characteristics, including age (at the time of index OUD visit), gender, race/ethnicity, eligibility category, rural residence, Managed Care Organization region, number of inpatient episodes in prior six months, number of outpatient episodes in prior six months, number of opioids fills in prior six months, number of benzodiazepine fills in prior six months, number of unique opioid prescribers in prior six months, Hepatitis C virus, human immunodeficiency virus, anxiety disorder, mood disorder, schizophrenia and other psychosis, posttraumatic stress disorder, abscess, osteomyelitis, endocarditis, and soft skin tissue infection. In the model that examines the overall effect, the coefficient of interest, i.e., “O-HQIP attesting,” is an indicator for whether a patient’s index ED OUD visit occurred during or after January 2019 (the start date for the O-HQIP) at O-HQIP attesting hospital.

a Other race/ethnic group includes American Indian, Alaska Native, Asian, Native Hawaiian, and Pacific Islander

**eTable 5.** Association of the Opioid Hospital Quality Improvement Program (O-HQIP) Attesting to Patient Treatment With Buprenorphine Within 30 Days of Index Emergency Department (ED) Visit, With April 2018 as the Implementation Date and Preintervention Data

| Model                             | Overall                 |        |       |
|-----------------------------------|-------------------------|--------|-------|
| Variable:                         | <b>O-HQIP attesting</b> |        |       |
| Statistics:                       | Coefficient             | 95% CI |       |
| Outcomes:                         |                         |        |       |
| <b>Panel A: Unadjusted Models</b> | 0.011                   | -0.016 | 0.038 |
| Buprenorphine within 30 Days      |                         |        |       |
| <b>Panel B: Adjusted Models</b>   | 0.009                   | -0.018 | 0.036 |
| Buprenorphine within 30 Days      |                         |        |       |
| Observations                      | 11019                   |        |       |

All analyses used linear regression at the patient level and included an indicator variable for if the patient was treated at an O-HQIP attesting hospital after April 1, 2018. All models also included hospital-level fixed effects to control for time-invariant hospital unobserved effects. Clustering was performed at the hospital level. \*\* = statistically different from zero at the 5% level. Adjusted regression models also controlled patient characteristics, including age (at the time of index OUD visit), gender, race/ethnicity, eligibility category, rural residence, Managed Care Organization region, number of inpatient episodes in prior six months, number of outpatient episodes in prior six months, number of opioids fills in prior six months, number of benzodiazepine fills in prior six months, number of unique opioid prescribers in prior six months, Hepatitis C virus, human immunodeficiency virus, anxiety disorder, mood disorder, schizophrenia and other psychosis, posttraumatic stress disorder, abscess, osteomyelitis, endocarditis, and soft skin tissue infection.

**eFigure.** Exploratory Plot Showing the Unadjusted Monthly Prevalence of 30-Day Buprenorphine Treatment for Patients Who Visited Opioid Hospital Quality Improvement Program (HQIP)– and non-Opioid (HQIP)–Attesting Hospitals, 2017-2020

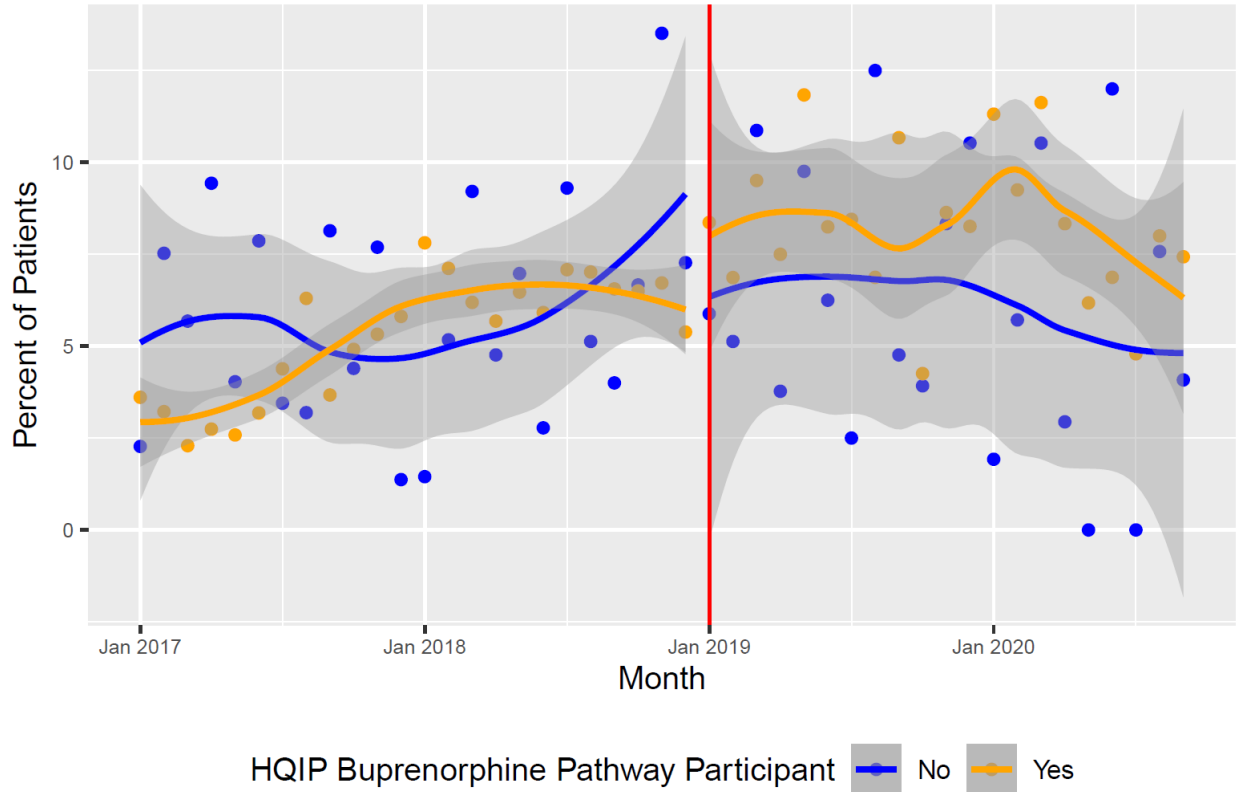

*Notes.* This figure shows the unadjusted monthly prevalence of 30-day buprenorphine treatment for Medicaid enrollees aged 18 to 64 years who were treated in hospitals attesting to an ED buprenorphine treatment O-HQIP pathway or non-O-HQIP attesting hospitals from 2017 to 2020. See Figure 1 for included study participants.
