# Supplementary material for: Association Between Hospital Adoption of an Emergency Department Treatment Pathway for Opioid Use Disorder and Patient Initiation of Buprenorphine After Discharge
Source: PubMed Central journal article supplement (PMC10313142; doi:10.1001/jamahealthforum.2023.0245), 2023-03-24
Supplement: jamahealthforum-e230245-s002.pdf [file jamahealthforum-e230245-s002.pdf]

## Data Sharing Statement

Solomon. Association Between Hospital Adoption of an Emergency Department Treatment Pathway for Opioid Use Disorder and Patient Initiation of Buprenorphine After Discharge. *JAMA Health Forum*. Published March 24, 2023. doi:10.1001/jamahealthforum.2023.0245

### Data

**Data available:** No

### Additional Information

**Explanation for why data not available:** The authors used restricted access to Medicaid claims data. Researchers may contact the Pennsylvania Department of Human Services for data access.
